# Supplementary material
Source: PubMed Central journal article supplement (PMC2877490)
Supplement: NIHMS186214-supplement-Supplement.pdf [file NIHMS186214-supplement-Supplement.pdf]

Supplement for "Divergent Oriented Synthesis For the Design of Reagents for Protein Conjugation"

Elisabeth Garanger, Joseph Blois, Scott A. Hilderbrand, Fangwei Shao, and Lee Josephson

Synthesis of CYAL-5.5

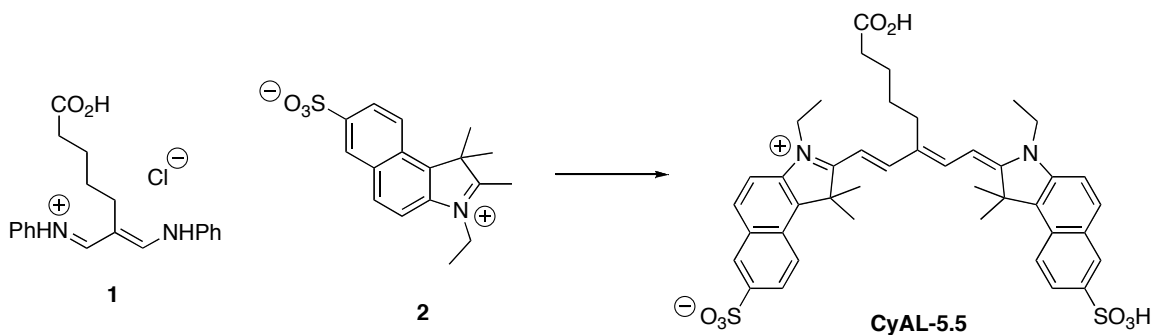

Briefly, CyAL-5.5 is prepared as follows: Malonaldehyde intermediate **1** was synthesized by the Vilsmeier-Haack-Arnold aminoforylation of methyl 7,7-dimethoxyheptanoate followed by treatment with aniline during workup. Intermediate **1** was then allowed to react with two equivalents of 3-ethyl-1,1,2-trimethyl-1H-benzo[e]indolium-7-sulfonate (**2**) in a 5:5:1 mixture of acetic acid/acetic anhydride/triethylamine to generate CyAL-5.5, which was purified by reverse phase chromatography eluting with acetonitrile in water.
